# Supplementary material for: Vortex fluidics-mediated DNA rescue from formalin-fixed museum specimens
Source: PLOS journal article supplement (doi:10.1371/journal.pone.0225807), 2020-01-30
Supplement: S2 (10.1371/journal.pone.0225807.s002) [file journal.pone.0225807.s002]

```

Previous Sequence:  ATTCCCTACCTTTATTGAGCAGCACCCCTCACGTTGAGCATTAGTTTGATCCAAAATTATGCAACTTCTTCACAATGAATT
Forward:           -----GTTGAGCATTAGTTTGATCCAAAATTATACAACTTCTTCACAATGAATT
Reverse:           ATTCCCTACCTTTATTGAGCAGCACCCCTCACGTTGAGCATTAGTTTGATCCAAAATTATACAACTTCTTCACAATGAATT

TCAAGCAATTTTAGGACAAGCCACTAAAGGTTCAACTATTTTATTCATTTCTTTATTAGATTTATTATATTCAATAACACTCTCGGGCTGCTCCCATAT
TCAAGCAATTTTAGGACAAGCCACTAAAGGTTCAACTATTTTATTCATTTCTTTATTAGATTTATTATATTCAATAACACTCTCGGGCTGCTCCCATAT
TCAAGCAATTTTAGGACAAGCCACTAAAGGTTCAACTATTTTATTCATTTCTTTATTAGATTTATTATATTCAATAACACTCTCGGGCTGCTCCCATAT

GTGTTTACTAGATCAAGACACCTTGCATAACTCTTACGCTTGCTTTACCTTTATGGCTAACTTTTATTTTATTGGTTGAATTAACCATACCCAAACACA
GTGTTTACTAGATCAAGACACCTTGCATAACTCTTACGCTTGCTTTACCTTTATGGCTAACTTTTATTTTATTGGTTGAATTAACCATACCCAAACACA
GTGTTTACTAGATCAAGACACCTTGCATAACTCTTACGCTTGCTTTACCTTTATGGCTAACTTTTATTTTATTGGTTGAATTAACCATACCCAAACACA

TGCTTGCTCATATGGTTCCCCAAGGAACACCAGGGCTTCTGATACCATTATAGTGTAGTAGAACTTTAAGAAATATTATTCGACCAGGAACCTTAGC
TGCTTGCTCATATGGTTCCCCAAGGAACACCAGGGCTTCTGATACCATTATAGTGTAGTAGAACTTTAAGAAATATTATTCGACCAGGAACCTTAGC
TGCTTGCTCATATGGTTCCCCAAGGAACACCAGGGCTTCTGATACCATTATAGTGTAGTAGAACTTTAAGAAATATTATTCGACCAGGAACCTTAGC

CGTTCGACTAGCAGCTAACATAATTGCAGGACATCTTTTGTGACACTTTTAGGCAATATAGGCCCTTCTTTGTCTTTGACTTTAGTCTCGTTTTTAATA
CGTTCGACTAGCAGCTAACATAATTGCAGGACATCTTTTGTGACACTTTTAGGCAATATAGGCCCTTCTTTGTCTTTGACTTTAGTCTCGTTTTTAATA
CGTTCGACTAGCAGCTAACATAATTGCAGGACATCTTTTGTGACACTTTTAGGCAATATAGGCCCTTCTTTGTCTTTGACTTTAGTCTCGTTTTTAATA

CTAGCTCAAATCCTTCTTTTAATACTAGAATCTGCTGTGCAATAATTCAATCGTATGTATTTGCTGTTCTAAGGACTTTATATGCCA
CTAGCTCAAATCCTTCTTTTAATACTAGAATCTGCTGTGCAATAATTCAATCGTATGTATTTGCTGTTCTAAGGACTTTATATGCCA
CTAGCTCAAATCCTTCTTTTAATACTAGAATCTGCTGTGCAAT-----

```

**S2 Fig. Expanded version of Fig 2C.** Sanger DNA sequencing of the target mitochondrial ATP synthase sequence from ground and sonicated then VFD-processed (9 krpm, 1 h, RT), formalin-fixed lobster tissue. Within the range of Sanger sequencing accuracy, two mutations (G2728A & G3136C, GenBank No. HQ402925) were observed as indicated. The reference sequence has been described previously [1].
